# Supplementary material for: Photo-Fenton-Like Treatment of Municipal Wastewater
Source: MDPI journal article supplement (doi:10.3390/catal11101206), 2021-10-08
Supplement: s1 [file s1]

Supplementary material

# Photo-Fenton-like Treatment of Municipal Wastewater

Yerkanat N. Kanafin <sup>1</sup>, Ardak Makhatova <sup>1</sup>, Vasilios Zarikas <sup>2</sup>, Elizabeth Arkhangelsky <sup>3</sup> and Stavros G. Pouloupoulos <sup>1,\*</sup>

<sup>1</sup> Chemical and Materials Engineering Department, School of Engineering and Digital Sciences, Environmental Science & Technology Group (ESTg), The Environment & Resource Efficiency Cluster (EREC), Nazarbayev University, Nur-Sultan 010000, Kazakhstan

<sup>2</sup> Mechanical and Aerospace Engineering Department, School of Engineering and Digital Sciences, Nazarbayev University, Nur-Sultan 010000, Kazakhstan

<sup>3</sup> Civil and Environmental Engineering Department, School of Engineering and Digital Sciences, Environmental Science & Technology Group (ESTg), The Environment & Resource Efficiency Cluster (EREC), Nazarbayev University, Nur-Sultan 010000, Kazakhstan

\* Correspondence: stavros.pouloupoulos@nu.edu.kz

**Citation:** Kanafin, Y.N.; Makhatova, A.; Zarikas, V.; Arkhangelsky, E.; Pouloupoulos, S.G. Photo-Fenton-like Treatment of Municipal Wastewater. *Catalysts* **2021**, *11*, 1206. <https://doi.org/10.3390/catal11101206>

Academic Editors: Danilo Russo and Dionissios Mantzavinos

Received: 13 August 2021

Accepted: 1 October 2021

Published: 8 October 2021

**Publisher's Note:** MDPI stays neutral with regard to jurisdictional claims in published maps and institutional affiliations.

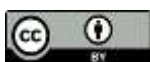

**Copyright:** © 2021 by the authors. Submitted for possible open access publication under the terms and conditions of the Creative Commons Attribution (CC BY) license (<https://creativecommons.org/licenses/by/4.0/>).

**Table S1.** R<sup>2</sup> and RMSE values for actual and predicted TC removal (%).

| Hidden nodes | Training       |        | Validation     |         | Score  |
|--------------|----------------|--------|----------------|---------|--------|
|              | R <sup>2</sup> | RMSE   | R <sup>2</sup> | RMSE    |        |
| 5            | 0.9724         | 1.2100 | 0.9558         | 2.0830  | 56.46  |
| 6            | 0.9658         | 1.3461 | 0.9739         | 1.5999  | 63.86  |
| 7            | 0.9730         | 1.4064 | 0.9970         | 0.2788  | 115.16 |
| 8            | 0.9902         | 0.7177 | 0.9756         | 1.5483  | 85.27  |
| 9            | -0.0060        | 7.3087 | -0.0665        | 10.2382 | 0.03   |
| 10           | 0.9335         | 1.8783 | 0.9814         | 1.3504  | 56.82  |
| 11           | 0.7690         | 3.8106 | 0.9853         | 0.9702  | 32.68  |
| 12           | 0.8152         | 3.1321 | 0.9746         | 1.5788  | 34.27  |
| 13           | 0.7213         | 3.8464 | 0.9591         | 2.0029  | 24.62  |
| 14           | -0.0060        | 7.3087 | -0.0665        | 10.2382 | 0.03   |
| 15           | 0.6964         | 4.7163 | 0.9180         | 1.4632  | 21.49  |
| 16           | 0.5455         | 4.9125 | 0.9830         | 1.2891  | 20.38  |
| 17           | -0.0060        | 7.3087 | -0.0665        | 10.2382 | 0.03   |
| 18           | -0.0060        | 7.3087 | -0.0665        | 10.2382 | 0.03   |
| 19           | 0.6739         | 4.1610 | 0.9819         | 1.3308  | 25.83  |
| 20           | 0.9863         | 1.0019 | 0.9999         | 0.0443  | 188.55 |

**Table S2.** R<sup>2</sup> and RMSE values for actual and predicted TOC removal (%).

| Hidden nodes | Training       |         | Validation     |         | Score  |
|--------------|----------------|---------|----------------|---------|--------|
|              | R <sup>2</sup> | RMSE    | R <sup>2</sup> | RMSE    |        |
| 5            | 0.9836         | 1.9011  | 0.9998         | 0.2982  | 89.44  |
| 6            | 0.9984         | 0.6146  | 0.9653         | 3.4919  | 46.97  |
| 7            | 0.9852         | 1.8103  | 0.9995         | 0.4355  | 87.70  |
| 8            | 0.9885         | 1.6890  | 1.0000         | 0.0263  | 115.26 |
| 9            | 0.9932         | 1.4407  | 0.9999         | 0.0570  | 132.63 |
| 10           | 0.9834         | 1.9152  | 1.0000         | 0.0149  | 101.91 |
| 11           | 0.9873         | 1.9536  | 0.9851         | 1.2340  | 61.03  |
| 12           | 0.9850         | 2.1408  | 1.0000         | 0.0145  | 91.42  |
| 13           | 0.9799         | 2.2307  | 1.0000         | 0.0137  | 87.34  |
| 14           | 0.9868         | 1.9950  | 0.9851         | 1.2334  | 60.22  |
| 15           | 0.9735         | 2.5630  | 1.0000         | 0.0004  | 75.98  |
| 16           | 0.9501         | 3.5153  | 1.0000         | 0.0111  | 53.96  |
| 17           | 0.9889         | 1.5686  | 1.0000         | 0.1121  | 117.67 |
| 18           | 0.0000         | 17.3679 | 0.0042         | 10.1319 | 0.00   |
| 19           | 0.9618         | 3.3949  | 0.9851         | 1.2333  | 40.96  |
| 20           | 0.9935         | 1.1989  | 0.9999         | 0.1610  | 146.10 |

**Table S3.** R<sup>2</sup> and RMSE values for actual and predicted TN removal (%).

| Hidden<br>nodes | Training       |         | Validation     |         | Score |
|-----------------|----------------|---------|----------------|---------|-------|
|                 | R <sup>2</sup> | RMSE    | R <sup>2</sup> | RMSE    |       |
| 5               | 0.9743         | 3.2111  | 0.9009         | 5.4923  | 20.23 |
| 6               | 0.9625         | 3.8770  | 0.8632         | 6.4531  | 16.18 |
| 7               | 0.9770         | 3.0346  | 0.9014         | 5.4798  | 20.75 |
| 8               | 0.8798         | 6.4946  | 0.9942         | 1.6802  | 21.56 |
| 9               | 0.9628         | 3.8624  | 0.8599         | 6.5306  | 16.03 |
| 10              | 0.8983         | 6.2723  | 0.9335         | 4.9227  | 14.99 |
| 11              | -0.0006        | 20.0449 | -0.0175        | 17.4474 | 0.00  |
| 12              | 0.7778         | 8.8315  | 0.9658         | 4.0958  | 11.90 |
| 13              | 0.7670         | 9.6723  | 0.9100         | 5.1883  | 9.53  |
| 14              | -0.0006        | 20.0449 | -0.0175        | 17.4474 | 0.00  |
| 15              | -0.0006        | 20.0449 | -0.0175        | 17.4474 | 0.00  |
| 16              | -0.0006        | 20.0449 | -0.0175        | 17.4474 | 0.00  |
| 17              | -0.0006        | 20.0449 | -0.0175        | 17.4474 | 0.00  |
| 18              | 0.3036         | 16.4103 | 0.9452         | 4.4662  | 4.72  |
| 19              | 0.9746         | 3.1941  | 0.9401         | 4.2699  | 24.57 |
| 20              | 0.9742         | 3.0107  | 0.9997         | 0.3707  | 57.62 |

**Table S4.** The concentrations of formic acid, acetic acid, intermediates, and CO<sub>2</sub> expressed in organic carbon (OC) for each run.

| Run            | Independent variables |      |                                                   |                                                                            | Organic carbon, mg L <sup>-1</sup> |             |             |                                |                         |
|----------------|-----------------------|------|---------------------------------------------------|----------------------------------------------------------------------------|------------------------------------|-------------|-------------|--------------------------------|-------------------------|
|                | Time                  | pH   | K <sub>2</sub> S <sub>2</sub> O <sub>8</sub> , mM | Molar ratio K <sub>2</sub> S <sub>2</sub> O <sub>8</sub> /Fe <sup>2+</sup> | Initial                            | Formic acid | Acetic acid | Mineralized (CO <sub>2</sub> ) | Remaining intermediates |
| 1              | 60                    | 5.35 | 30                                                | 10                                                                         | 20.30                              | 0.00        | 0.42        | 9.30                           | 10.58                   |
| 2              | 100                   | 3    | 30                                                | 10                                                                         | 20.62                              | 0.02        | 0.61        | 5.77                           | 14.22                   |
| 3              | 140                   | 5.35 | 20                                                | 7.5                                                                        | 21.84                              | 0.09        | 0.00        | 12.68                          | 9.07                    |
| 4              | 100                   | 3    | 10                                                | 10                                                                         | 21.78                              | 0.21        | 0.00        | 11.55                          | 10.02                   |
| 5              | 140                   | 3    | 20                                                | 10                                                                         | 20.11                              | 0.23        | 0.92        | 9.43                           | 9.53                    |
| 6              | 140                   | 5.35 | 30                                                | 10                                                                         | 21.15                              | 0.21        | 0.80        | 15.63                          | 4.51                    |
| 7              | 100                   | 5.35 | 20                                                | 10                                                                         | 20.40                              | 0.28        | 0.65        | 11.37                          | 8.10                    |
| 8              | 100                   | 7.7  | 10                                                | 10                                                                         | 21.53                              | 0.06        | 0.00        | 16.42                          | 5.05                    |
| 9              | 100                   | 5.35 | 20                                                | 10                                                                         | 21.38                              | 0.25        | 0.55        | 12.75                          | 7.82                    |
| 10             | 60                    | 5.35 | 20                                                | 7.5                                                                        | 18.78                              | 0.25        | 0.48        | 8.65                           | 9.40                    |
| 11             | 60                    | 3    | 20                                                | 10                                                                         | 21.09                              | 0.25        | 0.71        | 5.21                           | 14.92                   |
| 12             | 60                    | 5.35 | 10                                                | 10                                                                         | 19.10                              | 0.22        | 0.46        | 10.88                          | 7.54                    |
| 13             | 140                   | 5.35 | 20                                                | 12.5                                                                       | 20.28                              | 0.23        | 0.01        | 12.90                          | 7.14                    |
| 14             | 100                   | 7.7  | 20                                                | 12.5                                                                       | 20.28                              | 0.12        | 0.00        | 14.67                          | 5.49                    |
| 15             | 100                   | 3    | 20                                                | 7.5                                                                        | 19.04                              | 0.28        | 0.73        | 7.13                           | 10.90                   |
| 16             | 140                   | 7.7  | 20                                                | 10                                                                         | 19.04                              | 0.12        | 0.00        | 12.95                          | 5.97                    |
| 17             | 100                   | 3    | 20                                                | 12.5                                                                       | 21.04                              | 0.26        | 0.77        | 11.74                          | 8.28                    |
| 18             | 100                   | 5.35 | 20                                                | 10                                                                         | 21.04                              | 0.23        | 0.00        | 10.99                          | 9.82                    |
| 19             | 100                   | 7.7  | 20                                                | 7.5                                                                        | 19.13                              | 0.00        | 0.00        | 15.13                          | 4.00                    |
| 20             | 60                    | 5.35 | 20                                                | 12.5                                                                       | 19.13                              | 0.00        | 0.00        | 10.68                          | 8.45                    |
| 21             | 100                   | 5.35 | 10                                                | 7.5                                                                        | 18.62                              | 0.25        | 0.00        | 11.35                          | 7.02                    |
| 22             | 100                   | 5.35 | 30                                                | 12.5                                                                       | 20.04                              | 0.00        | 1.74        | 10.81                          | 7.49                    |
| 23             | 60                    | 7.7  | 20                                                | 10                                                                         | 20.02                              | 0.00        | 2.66        | 17.48                          | 0.00                    |
| 24             | 100                   | 7.7  | 30                                                | 10                                                                         | 18.88                              | 0.15        | 0.00        | 18.53                          | 0.19                    |
| 25             | 100                   | 5.35 | 10                                                | 12.5                                                                       | 18.88                              | 0.00        | 0.00        | 12.63                          | 6.25                    |
| 26             | 100                   | 5.35 | 30                                                | 7.5                                                                        | 20.77                              | 0.00        | 0.00        | 15.81                          | 4.96                    |
| 27             | 140                   | 5.35 | 10                                                | 10                                                                         | 18.45                              | 0.12        | 0.00        | 12.04                          | 6.29                    |
| RSM – TC opt.  | 60                    | 3    | 10                                                | 12.5                                                                       | 18.90                              | 0.06        | 0.26        | 8.58                           | 10.00                   |
| RSM – TOC opt. | 106.06                | 7.7  | 30                                                | 7.5                                                                        | 18.58                              | 0.00        | 0.00        | 18.58                          | 0.00                    |
| RSM – TN opt.  | 97.98                 | 4.33 | 15.05                                             | 12.5                                                                       | 21.00                              | 0.00        | 0.00        | 10.44                          | 10.56                   |
| ANN – TC opt.  | 140                   | 5.21 | 30                                                | 10.17                                                                      | 19.40                              | 0.00        | 0.00        | 9.84                           | 9.56                    |
| ANN – TOC opt. | 104.93                | 7.7  | 30                                                | 9.57                                                                       | 19.01                              | 0.00        | 0.00        | 19.01                          | 0.00                    |
| ANN – TN opt.  | 71.46                 | 4.2  | 17.59                                             | 12.5                                                                       | 18.20                              | 0.00        | 0.00        | 9.02                           | 9.18                    |

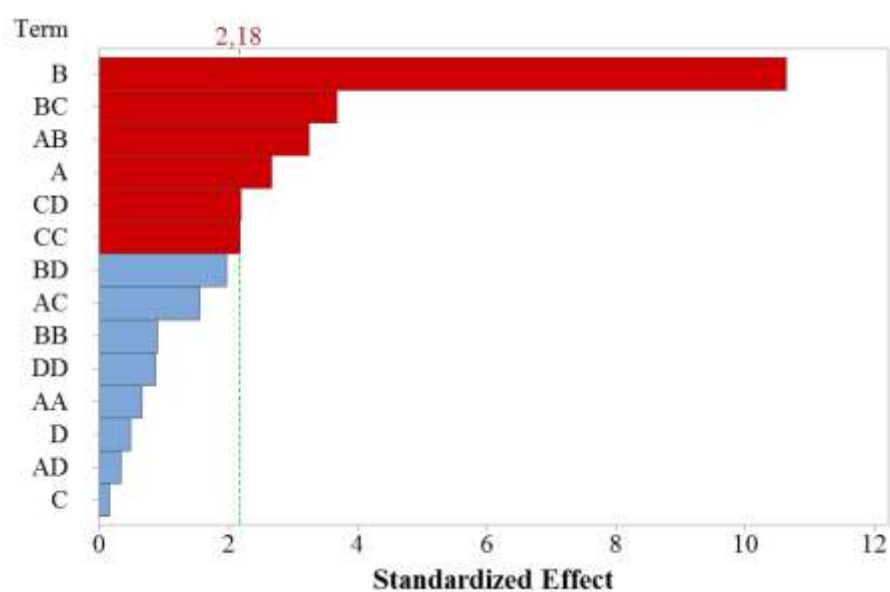

**Figure S1.** Pareto chart of the standardized effects (response is TOC removal (%); the reference line is at 2.18,  $\alpha=0.05$ ): (A) reaction time, (B) pH, (C)  $K_2S_2O_8$ , (D)  $K_2S_2O_8/Fe^{2+}$ .
